# Supplementary material for: Association of lockdowns with the protective role of ultraviolet-B (UVB) radiation in reducing COVID-19 deaths
Source: Springer Nature journal article supplement (doi:10.1038/s41598-021-01908-w), 2021-11-24
Supplement: MOESM1 [file 41598_2021_1908_MOESM1_ESM.pdf]

**Association of Lockdowns with the  
Protective Role of Ultraviolet-B (UVB) Radiation  
in Reducing COVID-19 Deaths**

**Supplementary Appendix**

**02. October, 2021**

Rahul Kalippurayil Moozhipurath\*<sup>1</sup>, Lennart Kraft<sup>2</sup>

(Faculty of Economics and Business, Goethe University Frankfurt<sup>1,2</sup>)

<sup>1</sup>Rahul Kalippurayil Moozhipurath (was affiliated to Goethe University at the time of first submission, when majority of work has been carried out); <sup>2</sup>Lennart Kraft; Faculty of Economics and Business, Goethe University Frankfurt, Theodor-W.-Adorno-Platz 4, 60629 Frankfurt, Germany; email: rahulkm85@gmail.com , Phone: +49-152-1301-0589; email: lennart.kraft@wiwi.uni-frankfurt.de.

## Table of Contents

|   |                                 |    |
|---|---------------------------------|----|
| 1 | Description of Methodology..... | 3  |
| 2 | Model Selection.....            | 7  |
| 3 | Robustness Checks.....          | 7  |
| 4 | References.....                 | 13 |

# 1 Description of Methodology

In this section, we describe the methodology of our study in more detail. We use a fixed-effect log-linear regression model to estimate the mitigating influence of lockdown severity on the association between UVI and growth rates of COVID-19 deaths . The model builds upon the theoretical framework as represented in Figure 1 in the *Manuscript*. This fixed-effect model is closely related to Moozhipurath, Kraft, and Skiera (2020)<sup>1</sup> as well as Hsiang et al. (2020)<sup>2</sup>.

Since a log-linear model considers percentage rather than absolute changes, the changes in COVID-19 deaths are more comparable over time across countries<sup>1</sup>. The fixed-effect model separates the associations of interest from country-specific time-constant factors that are outlined in Figure 1 in the *Manuscript*<sup>1</sup>. Such time-constant factors may consist of location (e.g., latitude), fixed diet patterns (e.g., intake of supplements or food which is fortified, the proportion of vegetarians, fish eaters, meat eaters, etc. in a population) as well as socio-economic factors which may be stable over our study period<sup>1</sup>. Further, the fixed-effect model may also capture time-constant factors directly related to vitamin D synthesis, such as age, skin pigmentation, among others<sup>1</sup>. Additionally, we include time-varying variables such as weather factors that may affect the likelihood of exposure to UVB radiation and subsequent vitamin D synthesis such as temperature, precipitation, etc<sup>1</sup>. Furthermore, we include linear and non-linear time-trends to control for further unobservable time-varying confounders<sup>1</sup>.

The major difference to Moozhipurath, Kraft, and Skiera (2020)<sup>1</sup> is that this study explores the lockdown's mitigating role on the protective effect of UVB exposure in reducing COVID-19 deaths. Therefore, this study extends the methodology described by Moozhipurath, Kraft, and Skiera (2020)<sup>1</sup> by focusing on the two additional sets of variables related to lockdown severity. Those additional sets consist of (i) variables representing the

lockdown severity and (ii) variables representing the interaction of the lockdown severity and UVI. Thus, we use the following model to explain the number of COVID-19 deaths:

$$D_{i,t} = D_{i,t-1} \times e^{\gamma + \sum_{j=0}^5 [UVI_{i,t-j} \beta_{UVI,j} + LD_{i,t-j} \beta_{LD,j} + UVI \cdot LD_{i,t-j} \beta_{UVI \cdot LD,j} + C_{i,t-j} \beta_{C,j}] + FI_{i,t} \beta_{FI} + u_i + \epsilon_{i,t}} \quad (1)$$

Similar to Moozhipurath, Kraft, and Skiera (2020)<sup>1</sup>,  $D_{i,t}$  represents the cumulative COVID-19 deaths for a country  $i$  at time point  $t$  (in days).  $D_{i,t}$  relates to the explanatory variables via an exponential growth model<sup>1</sup> on the right-hand side of the equation (1). As outlined by Moozhipurath, Kraft, and Skiera (2020)<sup>1</sup>, our exponential growth model also flexibly allows for different shapes for the cumulative COVID-19 deaths.

In this study, we use an exponential growth model that consists of eight explanatory parts, extending the model of Moozhipurath, Kraft, and Skiera (2020)<sup>1</sup>, which has six explanatory parts.

- 1)  $\gamma$  represents the daily growth rate of COVID-19 deaths from  $D_{i,t-1}$  to  $D_{i,t}$  that is independent of the factors presented in Figure 1 as shown in the *Manuscript*<sup>1</sup> similar to Moozhipurath, Kraft, and Skiera (2020)<sup>1</sup>.  $\gamma$  covers attributes specific to virus and its transmission such as its basic reproductive rate  $R_0$  combined with its lethality<sup>1</sup>.
- 2)  $UVI_{i,t-j}$  represents the daily UVI for a country  $i$  on a day  $t$ , lagged by  $j$  weeks. Therefore, similar to Moozhipurath, Kraft, and Skiera (2020)<sup>1</sup>,  $\beta_{UVI,j}$  reflects the effect of UVI lagged by  $j$  weeks<sup>1</sup>.
- 3)  $LD_{i,t-j}$  represents the lockdown severity  $LD$  for a country  $i$  at day  $t$  lagged by  $j$  weeks.  $\beta_{LD,j}$  reflects the effect of  $LD$  lagged by  $j$  weeks.  $LD$  can either consist of one variable lagged by  $j$  weeks as in Model 1, or it can consist of 2 dummy variables as in model 2 or 3. The first dummy variable of model 2 is equal to one if the lockdown severity is at least equal to 1. In contrast, the second dummy variable of model 2 is

equal to one if the lockdown severity is at least equal to two. The first dummy variable of model 3 is equal to one if the lockdown severity is at least equal to 1. In contrast, the second dummy variable of model 3 is equal to one if the lockdown severity is equal to three. Similarly,  $\beta_{LD,j}$  can measure the effect of a unit increase in the lockdown severity as in model 1.  $\beta_{LD,j}$  can also measure the effect of a specific lockdown severity as in model 2 and model 3.

- 4)  $UVI \cdot LD_{i,t-j}$  represents the interaction of  $UVI_{i,t-j}$  and the lockdown severity  $LD_{i,t-j}$  for a country  $i$  at day  $t$  lagged by  $j$  weeks.  $\beta_{UVI \cdot LD,j}$  reflects the effect of this interaction lagged by  $j$  weeks. We either interact  $UVI$  with variable  $LD$  for model 1 or we interact  $UVI$  with the dummy variable for model 2 and model 3. Therefore,  $\beta_{UVI \cdot LD,j}$  reflects the effect of a unit increase of  $UVI$  lagged by  $j$  weeks if the lockdown severity increases by one unit as for model 1. For model 2,  $\beta_{UVI \cdot LD,j}$  can represent the change of the effect of a unit increase of  $UVI$  when lockdown severity is 1 as compared to when lockdown severity is 0.  $\beta_{UVI \cdot LD,j}$  can also represent the change of the effect of a unit increase of  $UVI$  when lockdown severity is 2 or 3 as compared to when lockdown severity is 1. For model 3,  $\beta_{UVI \cdot LD,j}$  can represent the change of the effect of a unit increase of  $UVI$  when lockdown severity is 1 or 2 as compared to when lockdown severity is 0.  $\beta_{UVI \cdot LD,j}$  can also represent the change of the effect of a unit increase of  $UVI$  when lockdown severity is 3 as compared to when lockdown severity is 1 or 2.
- 5)  $C_{i,t-j}$  stands for the set of control variables, similar to Moozhipurath, Kraft, and Skiera (2020)<sup>1</sup>. These control variables consists of weather factors such as cloud index, ozone level, precipitation index, visibility level (an indicator of air pollution), humidity level, as well as temperature (minimum and maximum) for a country  $i$  on

day  $t$ , lagged by  $j$  weeks<sup>1</sup>. The vector  $\beta_{C,j}$  identifies the effect of these control variables lagged by  $j$  weeks<sup>1</sup>.

- 6)  $FI_{i,t}$  represents the time passed by since the COVID-19 infection is first reported in a country  $i$  on day  $t$  and  $\beta_{FI}$  identifies the associated effect<sup>1</sup>, similar to Moozhipurath, Kraft, and Skiera (2020)<sup>1</sup>.
- 7)  $u_i$  represents all time-constant country-specific factors impacting the growth rate of cumulative daily COVID-19 deaths (e.g., time-constant country-specific factors – e.g., population factors such as demographics, age composition, gender, culture, location, lifestyle, mobility, and co-morbidities as well as diet-related factors such as consumption of dietary supplements, diet rich in vitamin D (fish, meat and egg) and food fortification, similar to Moozhipurath, Kraft, and Skiera (2020)<sup>1</sup>.
- 8)  $\epsilon_{i,t}$  represents all remaining factors that are not identified, but have an effect on the cumulative daily COVID-19 deaths (i.e., all non-linear differences of growth rates with respect to time as well as country-specific linear differences of growth rates with respect to time), similar to Moozhipurath, Kraft, and Skiera (2020)<sup>1</sup>. They could also result from a decreasing number of people who could potentially become infected or contagious due to immunity, lockdowns in a country over time, mutation or changes in the virus in a specific country over time, systematic false reports of the dependent variable<sup>1</sup>.

An appropriate transformation as outlined in Moozhipurath, Kraft, and Skiera (2020)<sup>1</sup> results in the following estimable equation.

$$\Delta \ln(\check{D}_{i,t}) = \sum_{j=0}^5 [UVI_{i,t-j}\beta_{UVI,j} + LD_{i,t-j}\beta_{LD,j} + UVI \cdot LD_{i,t-j}\beta_{UVI \cdot LD,j} + \check{C}_{i,t-j}\beta_{C,j}] + FI_{i,t}\beta_{FI} + \epsilon_{i,t} \quad (2)$$

$\gamma$  and  $u_i$  do not appear in the equation anymore and a linear regression can identify all other coefficients as outlined in Moozhipurath, Kraft, and Skiera (2020)<sup>1</sup>. The sum of the

coefficients  $\beta$  for each variable measures the long-term effect of a permanent unit change of the respective variable and outlines by how many percentage points the growth-rate of COVID-19 deaths changes. If  $\sum_{j=0}^5 \beta_{UVI,j} = -0.085$ , then a permanent unit increase of UVI is associated with a 0.85 percentage points decline in the growth rates of COVID-19 deaths.

Equation (2) also shows why we can only use those observations where cumulative COVID-19 deaths are larger than zero. This condition explains the difference between the 31,044 observations of 155 countries in Table 2 and the 29,327 observations of 155 countries in Table 3. We listed the number of observations per country we used in the analysis in Table S3.

## 2 Model Selection

We estimated different versions of our model which varied in the number of weekly lags. We decided to choose a model with 5 weekly lags because we could not find any major differences concerning the estimated coefficients when we increased the number of lags. We favored a more parsimonious model.

## 3 Robustness Checks

To assess the robustness of our results of the primary model - Model 1 - we isolate the mitigating influence of lockdown severity on the association of UVI and growth rates of COVID-19 deaths from time trends in flexible ways. Models 4 – 9 in Table S1 and Table S2 isolate our findings from linear, square, and exponential time trends, which may be similar across countries or even country-specific. Overall, we find consistent results across different model specifications. A permanent unit increase of UVI and a permanent unit increase in lockdown severity are independently associated with a -0.35 – -0.94 and -4.4 – -6.6 percentage points reduction in growth rates of COVID-19 deaths respectively, according to different model specifications. Results also indicate that a permanent unit increase in

lockdown severity weakens the association of UVI in reducing the growth rates of COVID-19 deaths by 0.22 – 0.45 percentage points. Table S4 shows the latitude and longitude information of the countries used in the analysis.

**Table S1: Robustness Checks with Fixed-Effects Model**

|                           | Model 4            | Model 5                  | Model 6                            |
|---------------------------|--------------------|--------------------------|------------------------------------|
| Dependent Variables       | COVID-19 Deaths    | COVID-19 Deaths          | COVID-19 Deaths                    |
| UVI                       | -0.0084*** (15.40) | -0.0094*** (13.81)       | -0.0035* (3.98)                    |
| LD                        | -0.044*** (29.97)  | -0.066*** (44.85)        | -0.048*** (35.97)                  |
| LD x UVI                  | 0.0036*** (14.34)  | 0.0045*** (16.34)        | 0.0022* (5.87)                     |
| Control Variables         |                    |                          |                                    |
| Time Trend                | Linear and Square  | Country-specific Linear  | Country-specific Linear and Square |
| Country Fixed Effects     | Yes                | Yes                      | Yes                                |
| Precipitation index       | Yes                | Yes                      | Yes                                |
| Cloud index               | Yes                | Yes                      | Yes                                |
| Ozone level               | Yes                | Yes                      | Yes                                |
| Visibility Level          | Yes                | Yes                      | Yes                                |
| Humidity level            | Yes                | Yes                      | Yes                                |
| Temperature (min and max) | Yes                | Yes                      | Yes                                |
| Number of Coefficients    | 62 (+ 155 FE)      | 60 (+ 155 FE + 155 TCSE) | 60 (+ 155 FE + 310 TCSE)           |
| Number of Observations    | 29,327             | 29,327                   | 29,327                             |
| Number of Countries       | 155                | 155                      | 155                                |
| R-squared Within          | 18.44%             | 22.31%                   | 27.44%                             |

Note: +:  $p < 0.10$ , \*:  $p < 0.05$ , \*\*:  $p < 0.01$ . F-statistic for long-run coefficient in parentheses. TCSE stands for time country-specific effects. LD stands for Lockdown Severity.



**Table S2: Robustness Checks with Fixed-Effects Model**

|                           | <b>Model 7</b>         | <b>Model 8</b>                          | <b>Model 9</b>                                  |
|---------------------------|------------------------|-----------------------------------------|-------------------------------------------------|
| Dependent Variables       | COVID-19 Deaths        | COVID-19 Deaths                         | COVID-19 Deaths                                 |
| UVI                       | -0.0085*** (14.54)     | -0.0085*** (14.38)                      | -0.0035* (3.92)                                 |
| LD                        | -0.047*** (33.01)      | -0.047*** (32.43)                       | -0.048*** (36.36)                               |
| LD x UVI                  | 0.0037** (15.01)       | 0.0037*** (14.59)                       | 0.0022* (5.90)                                  |
| <b>Control Variables</b>  |                        |                                         |                                                 |
| Time Trend                | Linear and Exponential | Linear and Country-specific Exponential | Country-specific Linear, Square and Exponential |
| Country Fixed Effects     | Yes                    | Yes                                     | Yes                                             |
| Precipitation index       | Yes                    | Yes                                     | Yes                                             |
| Cloud index               | Yes                    | Yes                                     | Yes                                             |
| Ozone level               | Yes                    | Yes                                     | Yes                                             |
| Visibility Level          | Yes                    | Yes                                     | Yes                                             |
| Humidity level            | Yes                    | Yes                                     | Yes                                             |
| Temperature (min and max) | Yes                    | Yes                                     | Yes                                             |
| Number of Coefficients    | 62 (+ 155 FE)          | 61 (+ 155 FE + 155 TSCE)                | 60 (+ 155 FE + 465 TSCE)                        |
| Number of Observations    | 29,327                 | 29,327                                  | 29,327                                          |
| Number of Countries       | 155                    | 155                                     | 155                                             |
| R-squared Within          | 17.61%                 | 17.72%                                  | 27.52%                                          |

Note: +:  $p < 0.10$ , \*:  $p < 0.05$ , \*\*:  $p < 0.01$ . F-statistic for long-run coefficient in parentheses. TCSE stands for time country-specific effects. LD stands for Lockdown Severity.

**Figure S1: Average Ultraviolet-Index (UVI) of New York City, NY<sup>3</sup>**

---

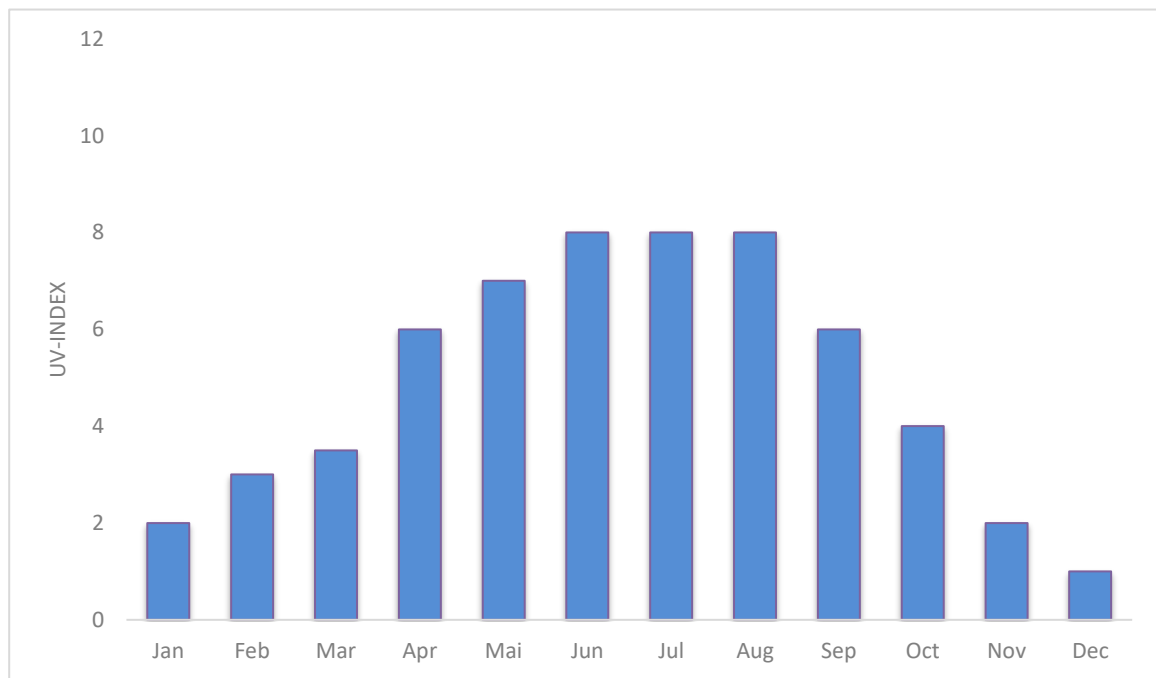

Table S3: Number of Observations (Obs.) of Countries Used in Analysis

| Country                      | Obs. | Country            | Obs. | Country          | Obs. | Country              | Obs. |
|------------------------------|------|--------------------|------|------------------|------|----------------------|------|
| Afghanistan                  | 197  | Denmark            | 205  | Kuwait           | 186  | Rwanda               | 130  |
| Albania                      | 192  | Djibouti           | 180  | Kyrgyzstan       | 185  | San Marino           | 205  |
| Algeria                      | 207  | Dominican Republic | 202  | Latvia           | 187  | Saudi Arabia         | 197  |
| Andorra                      | 199  | Ecuador            | 202  | Lebanon          | 211  | Senegal              | 189  |
| Angola                       | 183  | Egypt              | 213  | Lesotho          | 90   | Serbia               | 197  |
| Argentina                    | 200  | El Salvador        | 184  | Liberia          | 186  | Sierra Leone         | 167  |
| Australia                    | 220  | Estonia            | 196  | Libya            | 179  | Singapore            | 200  |
| Austria                      | 207  | Eswatini           | 174  | Lithuania        | 200  | Slovakia             | 189  |
| Azerbaijan                   | 202  | Ethiopia           | 185  | Luxembourg       | 203  | Slovenia             | 198  |
| Bahrain                      | 205  | Fiji               | 68   | Madagascar       | 143  | Somalia              | 182  |
| Bangladesh                   | 195  | Finland            | 200  | Malawi           | 170  | South Africa         | 194  |
| Barbados                     | 185  | France             | 235  | Malaysia         | 204  | South Sudan          | 145  |
| Belarus                      | 190  | Gabon              | 189  | Mali             | 178  | Spain                | 218  |
| Belgium                      | 210  | Gambia             | 186  | Mauritania       | 189  | Sri Lanka            | 193  |
| Belize                       | 180  | Georgia            | 186  | Mauritius        | 185  | Sudan                | 190  |
| Benin                        | 184  | Germany            | 212  | Mexico           | 202  | Suriname             | 187  |
| Bolivia                      | 192  | Ghana              | 189  | Moldova          | 195  | Sweden               | 211  |
| Bosnia and Herzegovina       | 198  | Greece             | 206  | Morocco          | 201  | Switzerland          | 207  |
| Botswana                     | 173  | Guatemala          | 189  | Mozambique       | 135  | Syria                | 181  |
| Brazil                       | 204  | Guinea             | 175  | Namibia          | 89   | Taiwan*              | 234  |
| Brunei                       | 193  | Guyana             | 191  | Nepal            | 144  | Tajikistan           | 142  |
| Bulgaria                     | 189  | Haiti              | 183  | Netherlands      | 205  | Tanzania             | 187  |
| Burkina Faso                 | 193  | Honduras           | 192  | New Zealand      | 192  | Thailand             | 220  |
| Burundi                      | 172  | Hungary            | 199  | Nicaragua        | 184  | Togo                 | 194  |
| Cameroon                     | 196  | Iceland            | 202  | Niger            | 182  | Trinidad and Tobago  | 189  |
| Canada                       | 212  | India              | 210  | Nigeria          | 198  | Tunisia              | 199  |
| Central African Republic     | 137  | Indonesia          | 201  | Norway           | 206  | Turkey               | 192  |
| Chad                         | 162  | Iran               | 213  | Oman             | 190  | US                   | 221  |
| Chile                        | 199  | Iraq               | 208  | Pakistan         | 203  | Uganda               | 75   |
| China                        | 241  | Ireland            | 203  | Panama           | 193  | Ukraine              | 200  |
| Colombia                     | 197  | Israel             | 200  | Papua New Guinea | 71   | United Arab Emirates | 201  |
| Congo (Kinshasa)             | 192  | Italy              | 229  | Paraguay         | 195  | United Kingdom       | 215  |
| Costa Rica                   | 197  | Jamaica            | 192  | Peru             | 197  | Uruguay              | 190  |
| Cote d'Ivoire                | 192  | Japan              | 237  | Philippines      | 233  | Uzbekistan           | 188  |
| Croatia                      | 202  | Jordan             | 194  | Poland           | 199  | Venezuela            | 189  |
| Cuba                         | 191  | Kazakhstan         | 190  | Portugal         | 201  | Vietnam              | 68   |
| Cyprus                       | 194  | Kenya              | 190  | Qatar            | 193  | Yemen                | 160  |
| Czechia                      | 199  | Korea, South       | 230  | Romania          | 199  | Zambia               | 185  |
|                              |      | Kosovo             | 189  | Russia           | 202  | Zimbabwe             | 183  |
| Total Number of Observations |      |                    |      | 29,327           |      |                      |      |

**Table S4: Latitude (Lat.) and longitude (Long.) of countries used in analysis**

| Country                  | Lat.   | Long.  | Country      | Lat.   | Long.   | Country             | Lat.   | Long.   |
|--------------------------|--------|--------|--------------|--------|---------|---------------------|--------|---------|
| Afghanistan              | 33.94  | 67.71  | Gambia       | 13.44  | -15.31  | Norway              | 60.47  | 8.47    |
| Albania                  | 41.15  | 20.17  | Georgia      | 42.32  | 43.36   | Oman                | 21.51  | 55.92   |
| Algeria                  | 28.03  | 1.66   | Germany      | 51.17  | 10.45   | Pakistan            | 30.38  | 69.35   |
| Andorra                  | 42.51  | 1.52   | Ghana        | 7.95   | -1.02   | Panama              | 8.54   | -80.78  |
| Angola                   | -11.20 | 17.87  | Greece       | 39.07  | 21.82   | Papua New Guinea    | -6.31  | 143.96  |
| Argentina                | -38.42 | -63.62 | Guatemala    | 15.78  | -90.23  | Paraguay            | -23.44 | -58.44  |
| Australia                | -32.11 | 141.36 | Guinea       | 9.95   | -9.70   | Peru                | -9.19  | -75.02  |
| Austria                  | 47.52  | 14.55  | Guyana       | 4.86   | -58.93  | Philippines         | 12.88  | 121.77  |
| Azerbaijan               | 40.14  | 47.58  | Haiti        | 18.97  | -72.29  | Poland              | 51.92  | 19.15   |
| Bahrain                  | 26.03  | 50.55  | Honduras     | 15.20  | -86.24  | Portugal            | 39.40  | -8.22   |
| Bangladesh               | 23.69  | 90.36  | Hungary      | 47.16  | 19.50   | Qatar               | 25.35  | 51.18   |
| Barbados                 | 13.19  | -59.54 | Iceland      | 64.96  | -19.02  | Romania             | 45.94  | 24.97   |
| Belarus                  | 53.71  | 27.95  | India        | 20.59  | 78.96   | Russia              | 61.52  | 105.32  |
| Belgium                  | 50.83  | 4.47   | Indonesia    | -0.79  | 113.92  | Rwanda              | -1.94  | 29.87   |
| Belize                   | 17.19  | -88.50 | Iran         | 32.43  | 53.69   | San Marino          | 43.94  | 12.46   |
| Benin                    | 9.31   | 2.32   | Iraq         | 33.22  | 43.68   | Saudi Arabia        | 23.89  | 45.08   |
| Bolivia                  | -16.29 | -63.59 | Ireland      | 53.14  | -7.69   | Senegal             | 14.50  | -14.45  |
| Bosnia and Herzegovina   | 43.92  | 17.68  | Israel       | 31.05  | 34.85   | Serbia              | 44.02  | 21.01   |
| Botswana                 | -22.33 | 24.68  | Italy        | 41.87  | 12.57   | Sierra Leone        | 8.46   | -11.78  |
| Brazil                   | -14.24 | -51.93 | Jamaica      | 18.11  | -77.30  | Singapore           | 1.28   | 103.83  |
| Brunei                   | 4.54   | 114.73 | Japan        | 36.20  | 138.25  | Slovakia            | 48.67  | 19.70   |
| Bulgaria                 | 42.73  | 25.49  | Jordan       | 31.24  | 36.51   | Slovenia            | 46.15  | 15.00   |
| Burkina Faso             | 12.24  | -1.56  | Kazakhstan   | 48.02  | 66.92   | Somalia             | 5.15   | 46.20   |
| Burundi                  | -3.37  | 29.92  | Kenya        | -0.02  | 37.91   | South Africa        | -30.56 | 22.94   |
| Cameroon                 | 3.85   | 11.50  | Korea, South | 35.91  | 127.77  | South Sudan         | 6.88   | 31.31   |
| Canada                   | 52.82  | -91.70 | Kosovo       | 42.60  | 20.90   | Spain               | 40.46  | -3.75   |
| Central African Republic | 6.61   | 20.94  | Kuwait       | 29.31  | 47.48   | Sri Lanka           | 7.87   | 80.77   |
| Chad                     | 15.45  | 18.73  | Kyrgyzstan   | 41.20  | 74.77   | Sudan               | 12.86  | 30.22   |
| Chile                    | -35.68 | -71.54 | Latvia       | 56.88  | 24.60   | Suriname            | 3.92   | -56.03  |
| China                    | 32.89  | 111.79 | Lebanon      | 33.85  | 35.86   | Sweden              | 60.13  | 18.64   |
| Colombia                 | 4.57   | -74.30 | Lesotho      | -29.61 | 28.23   | Switzerland         | 46.82  | 8.23    |
| Congo (Kinshasa)         | -4.04  | 21.76  | Liberia      | 6.43   | -9.43   | Syria               | 34.80  | 39.00   |
| Costa Rica               | 9.75   | -83.75 | Libya        | 26.34  | 17.23   | Taiwan*             | 23.70  | 121.00  |
| Cote d'Ivoire            | 7.54   | -5.55  | Lithuania    | 55.17  | 23.88   | Tajikistan          | 38.86  | 71.28   |
| Croatia                  | 45.10  | 15.20  | Luxembourg   | 49.82  | 6.13    | Tanzania            | -6.37  | 34.89   |
| Cuba                     | 21.52  | -77.78 | Madagascar   | -18.77 | 46.87   | Thailand            | 15.87  | 100.99  |
| Cyprus                   | 35.13  | 33.43  | Malawi       | -13.25 | 34.30   | Togo                | 8.62   | 0.82    |
| Czechia                  | 49.82  | 15.47  | Malaysia     | 4.21   | 101.98  | Trinidad and Tobago | 10.69  | -61.22  |
| Denmark                  | 63.29  | -13.34 | Mali         | 17.57  | -4.00   | Tunisia             | 33.89  | 9.54    |
| Djibouti                 | 11.83  | 42.59  | Mauritania   | 21.01  | -10.94  | Turkey              | 38.96  | 35.24   |
| Dominican Republic       | 18.74  | -70.16 | Mauritius    | -20.35 | 57.55   | US                  | 40.00  | -100.00 |
| Ecuador                  | -1.83  | -78.18 | Mexico       | 23.63  | -102.55 | Uganda              | 1.37   | 32.29   |
| Egypt                    | 26.82  | 30.80  | Moldova      | 47.41  | 28.37   | Ukraine             | 48.38  | 31.17   |

|             |        |        |             |        |        |                      |        |        |
|-------------|--------|--------|-------------|--------|--------|----------------------|--------|--------|
| El Salvador | 13.79  | -88.90 | Morocco     | 31.79  | -7.09  | United Arab Emirates | 23.42  | 53.85  |
| Estonia     | 58.60  | 25.01  | Mozambique  | -18.67 | 35.53  | United Kingdom       | 24.55  | -43.90 |
| Eswatini    | -26.52 | 31.47  | Namibia     | -22.96 | 18.49  | Uruguay              | -32.52 | -55.77 |
| Ethiopia    | 9.15   | 40.49  | Nepal       | 28.17  | 84.25  | Uzbekistan           | 41.38  | 64.59  |
| Fiji        | -17.71 | 178.07 | Netherlands | 21.41  | -52.99 | Venezuela            | 6.42   | -66.59 |
| Finland     | 61.92  | 25.75  | New Zealand | -40.90 | 174.89 | Vietnam              | 14.06  | 108.28 |
| France      | 8.31   | 5.46   | Nicaragua   | 12.87  | -85.21 | Yemen                | 15.55  | 48.52  |
| Gabon       | -0.80  | 11.61  | Niger       | 17.61  | 8.08   | Zambia               | -13.13 | 27.85  |
|             |        |        | Nigeria     | 9.08   | 8.68   | Zimbabwe             | -19.02 | 29.15  |

## 4 References

1. Moozhipurath, R. K., Kraft, L. & Skiera, B. Evidence of protective role of ultraviolet-B (UVB) radiation in reducing COVID-19 deaths. *Scientific Reports* **10**, 17705 (2020).
2. Hsiang, S. *et al.* The effect of large-scale anti-contagion policies on the COVID-19 pandemic. *Nature* **584**, 262–267 (2020).
3. New York City, NY - Detaillierte Klimaangaben und Monatliche Wettervorhersage. *Weather Atlas* <https://www.weather-us.com/de/new-york-usa/new-york-city-klima> (2020).
